# Supplementary material for: Sensitive Immunopeptidomics by Leveraging Available Large-Scale Multi-HLA Spectral Libraries, Data-Independent Acquisition, and MS/MS Prediction
Source: PubMed Central journal article supplement (PMC8724634; doi:10.1016/j.mcpro.2021.100080), 2021-04-09
Supplement: mmc13.pdf [file mmc13.pdf]

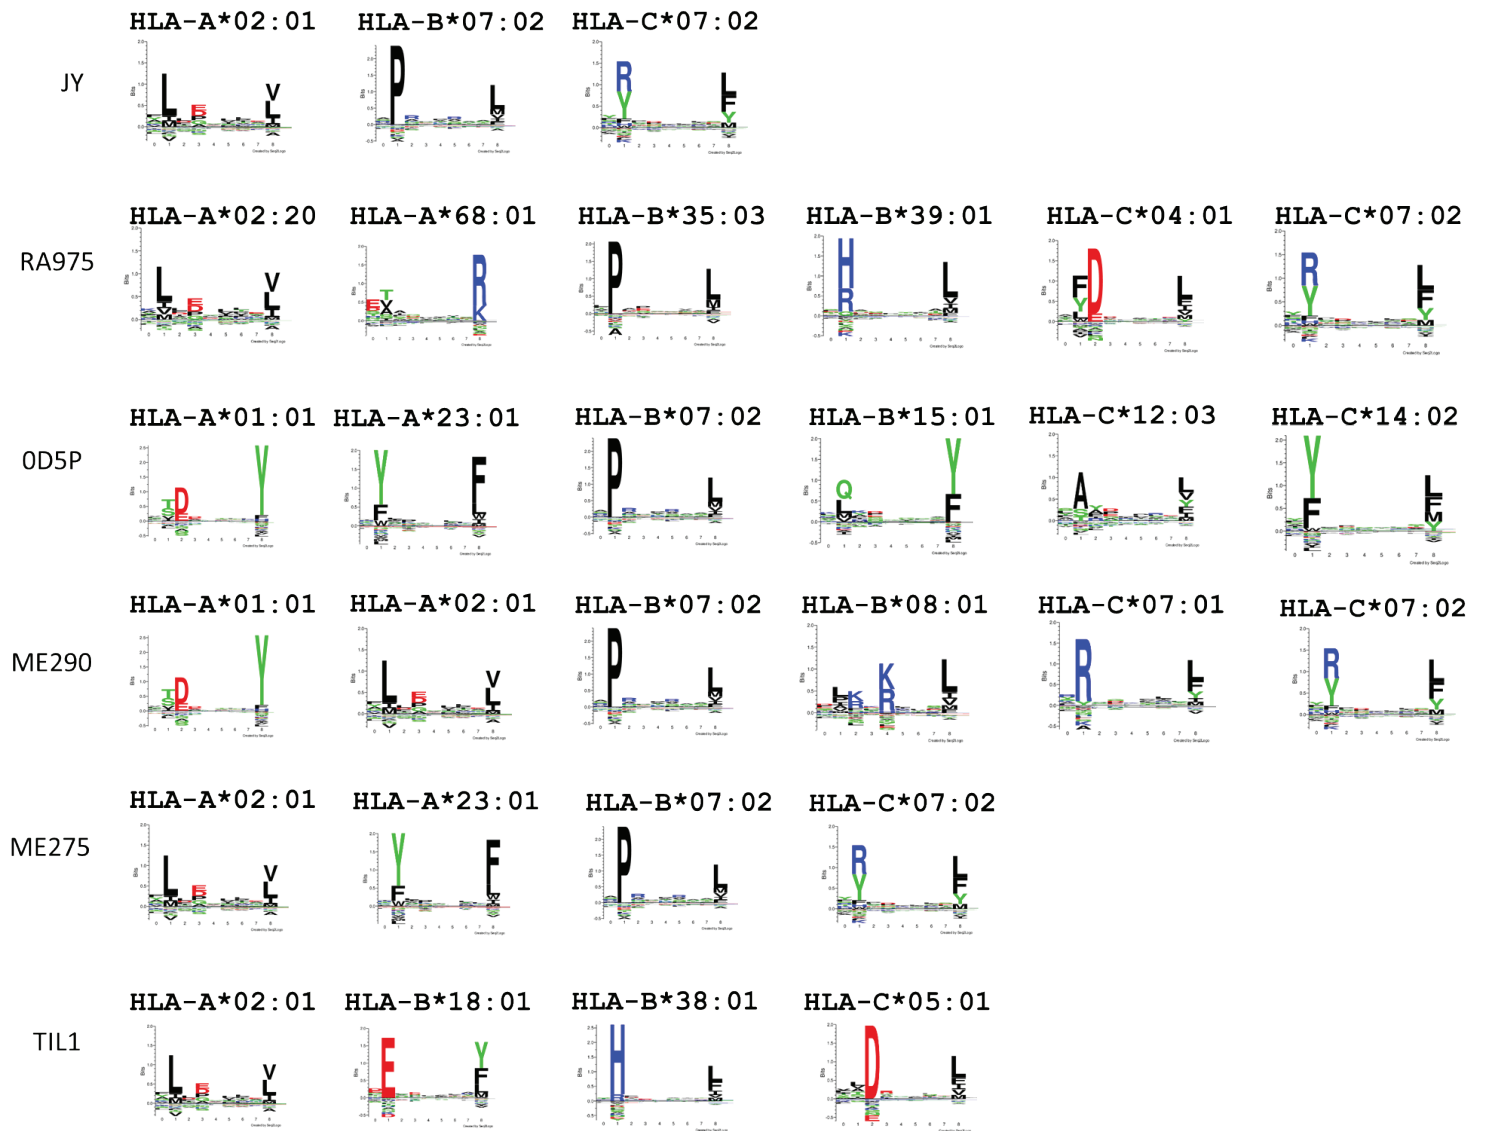

**Supplemental Figure 1.** Reference HLA binding motifs from NetMHCpan motif viewer of HLA allotypes expressed in the six selected samples that were analyzed in this study and that were included in the sample-specific, combined and mixed libraries.
