# Supplementary material for: Sensitive Immunopeptidomics by Leveraging Available Large-Scale Multi-HLA Spectral Libraries, Data-Independent Acquisition, and MS/MS Prediction
Source: PubMed Central journal article supplement (PMC8724634; doi:10.1016/j.mcpro.2021.100080), 2021-04-09
Supplement: mmc16.pdf [file mmc16.pdf]

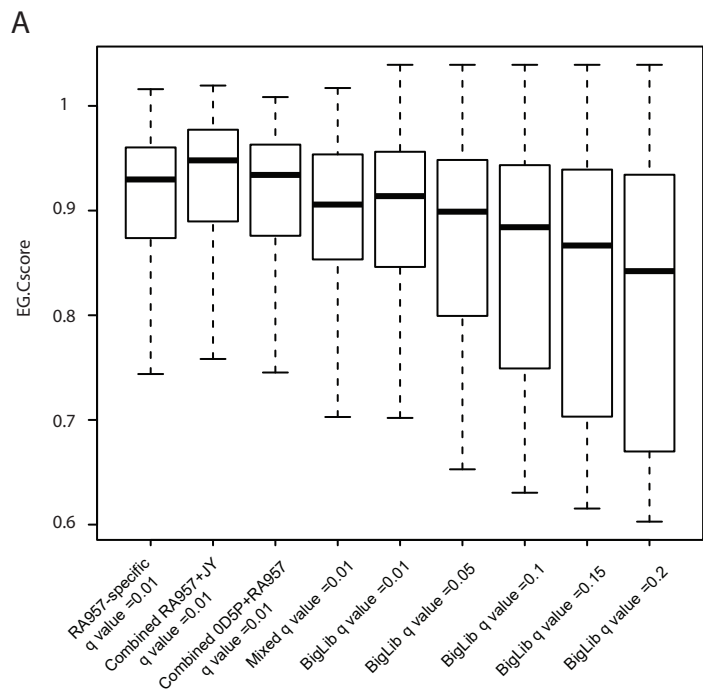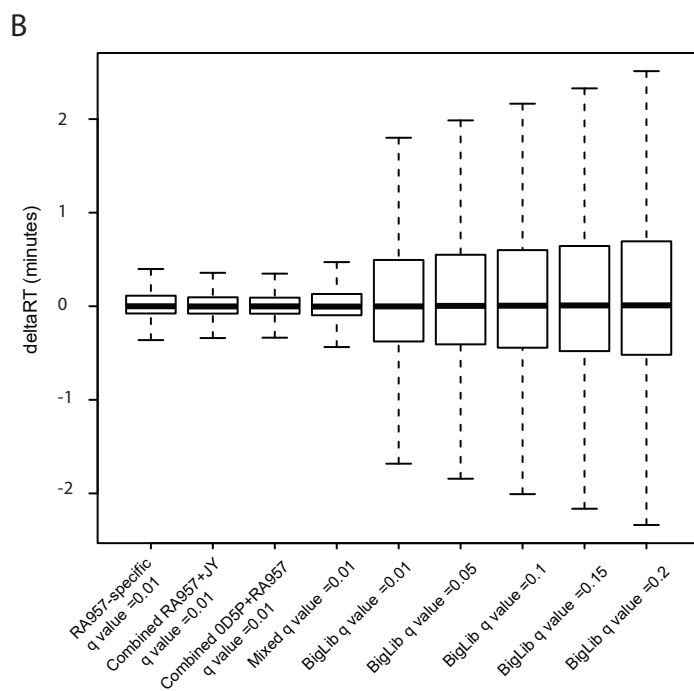

**Supplemental Figure 4:** EG.Cscore distributions (**A**) and differences between the predicted RT= $f(iRT)$  and the mean measured RT (**B**) in RA957 DIA data in relation to the library size (RA957 sample specific, combined, mixed, and BigLib, as well as BigLib analyzed with increasing q values).
