# Supplementary material for: Sensitive Immunopeptidomics by Leveraging Available Large-Scale Multi-HLA Spectral Libraries, Data-Independent Acquisition, and MS/MS Prediction
Source: PubMed Central journal article supplement (PMC8724634; doi:10.1016/j.mcpro.2021.100080), 2021-04-09
Supplement: mmc17.pdf [file mmc17.pdf]

OD5P:

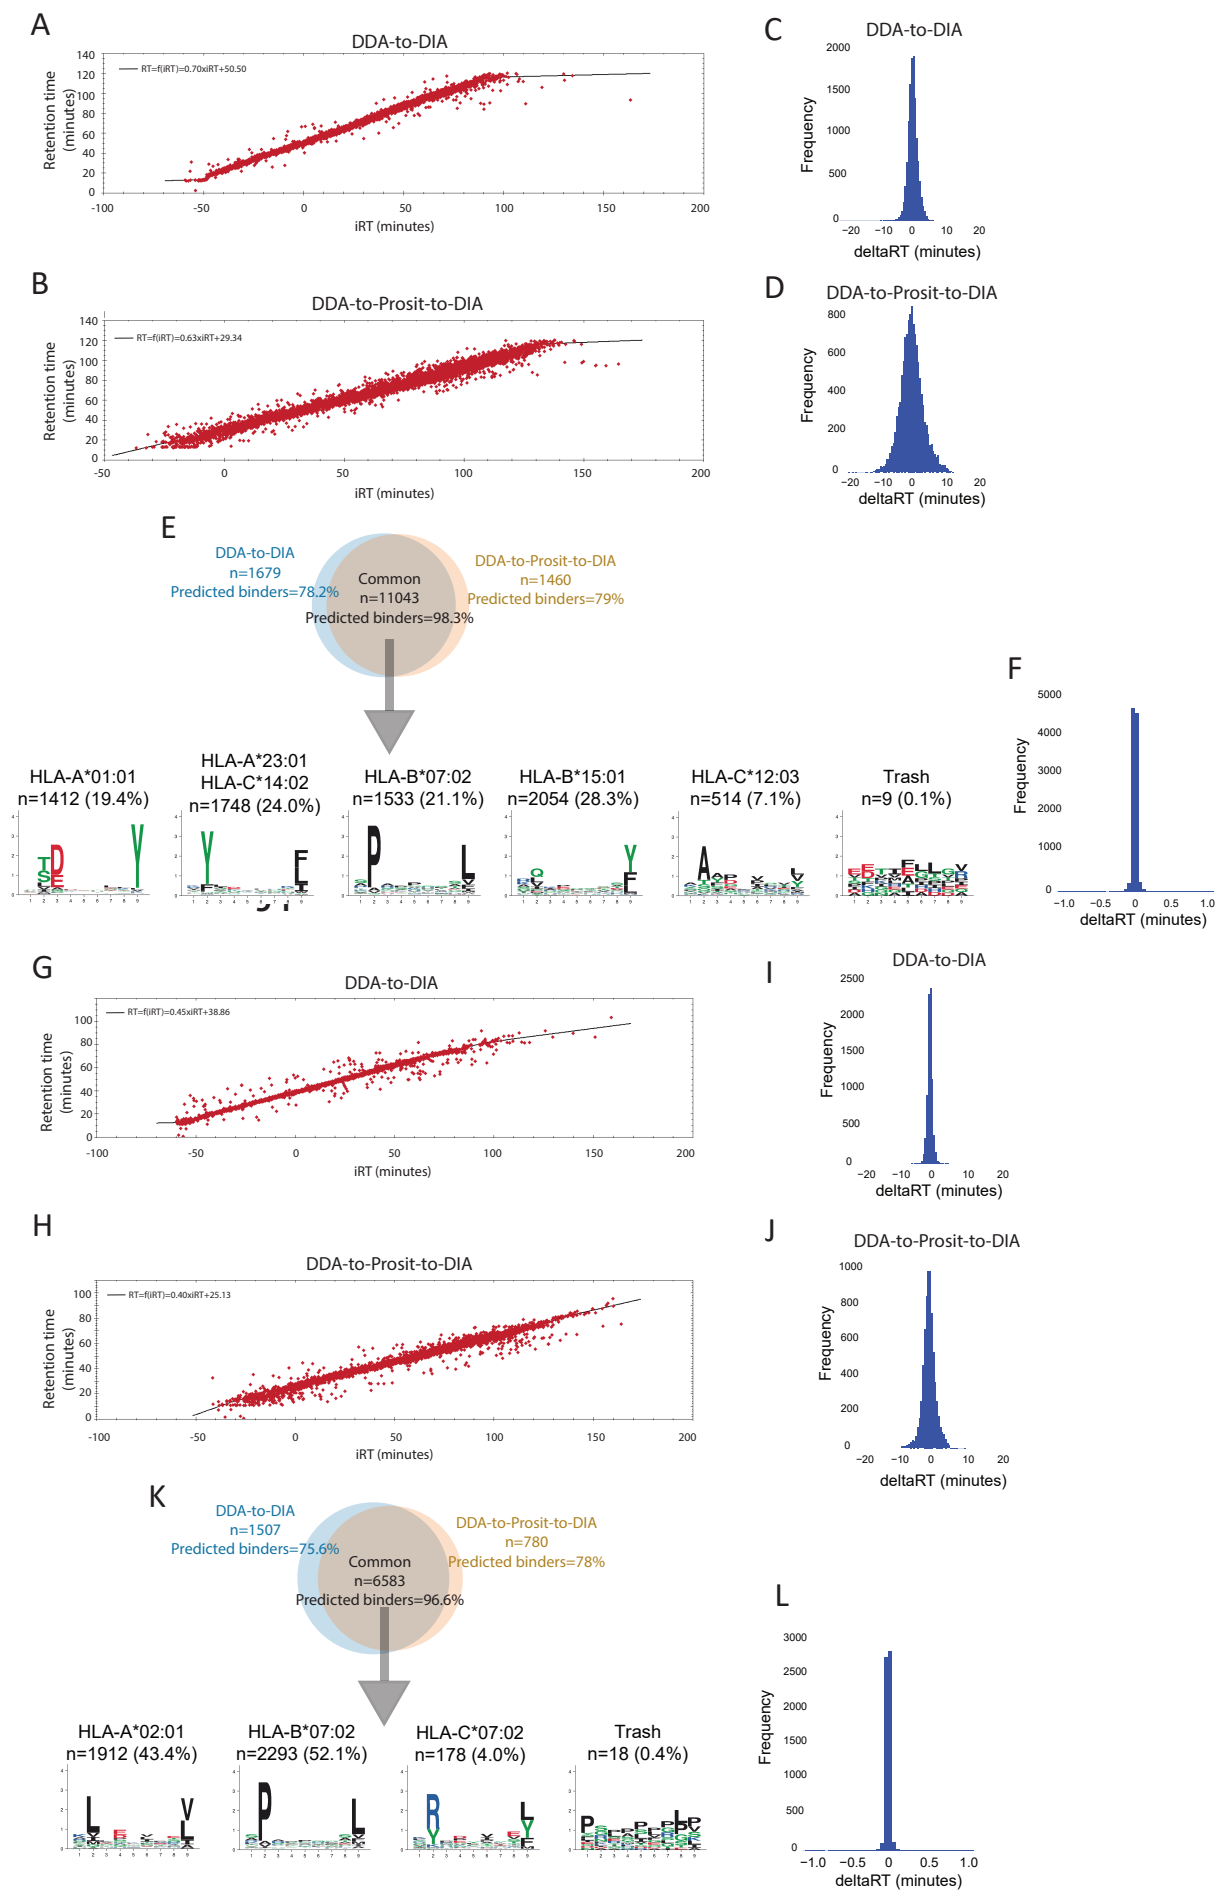

**Supplemental Figure 5:** Correlations between measured RT and the predicted RT calculated by Spectronaut ( $RT = f(iRT)$ ) of peptides identified in OD5P samples applying the BigLib library in the DDA-to-DIA approach (**A**) and with the Prosit-predicted BigLib library in the DDA-to-Prosit-to-DIA approach (**B**). The difference between the predicted RT  $= f(iRT)$  and the mean measured RT in the DIA data calculated for peptides identified in the DDA-to-DIA (**C**) and in the DDA-to-Prosit-to-DIA (**D**). The overlap between peptides identified in the two approaches is represented in a venn diagram (**E**). The fraction of peptides predicted as HLA binders is provided for unique and common peptide groups. Common 9 mer peptides were clustered to reveal the binding motifs. Frequency plot of the delta apex, which is the difference between the measured peptide apex obtained in the DDA-to-DIA and the DDA-to-Prosit-to-DIA (**F**). The same analyses as above are provided for JY samples (**G-L**).
